# Supplementary material for: Sas10 controls ribosome biogenesis by stabilizing Mpp10 and delivering the Mpp10–Imp3–Imp4 complex to nucleolus
Source: PubMed Central journal article supplement — Nucleic Acids Res. 2019 Feb 18;47(6):2996–3012. doi: 10.1093/nar/gkz105 (PMC6451133; doi:10.1093/nar/gkz105), 2019-02-18

## SUPPLEMENTARY FIGURE LEGENDS

**Supplementary Figure S1.** (A) Alignment of amino acids sequences of Sas10 from human (hu, accession number: NM\_020368.2), mouse (mu, accession number: NM\_023054.2) and zebrafish (zf, accession number: NM\_001004595.1) using the software Genedoc . The Sas10/C1D domain is highlighted by a blue underline. (B,C) The specificity test of a rabbit polyclonal antibody (Rb poly) (B) and a mouse monoclonal antibody (Mus mono) (C) against zebrafish Sas10 using total proteins extracted from the 5-dpf old WT and *sas10<sup>A2</sup>* (*s<sup>A2</sup>*) embryos. The anti-Sas10 monoclonal antibody also detected a non-specific band (lower band).

**Supplementary Figure S2.** (A) Alignment of amino acids sequences of Mpp10 from human (hu, accession number: NM\_005791.2), mouse (mu, accession number: NM\_026483.2) and zebrafish (zf, accession number: NM\_001305543.1) using the software Genedoc. Red box, predicted Capn3 recognition sites; light blue underline, domain responsible for interaction with Utp3/Sas10 in yeast; purple underline, domain responsible for interaction with Imp3 in yeast; green underline, domain responsible for interaction with Imp4 in human; orange underline, domain responsible for interaction with Imp3 in human. (B) The specificity test of a rabbit polyclonal antibody against zebrafish Mpp10 using total protein extracted from the 5-dpf old WT and *mpp10<sup>A10</sup>* (*m<sup>A10</sup>*) embryos.

**Supplementary Figure S3. *sas10* is essential for the organogenesis of digestive organs.**

(A) Whole-mount in situ hybridization (WISH) using the *sas10* probe on WT unfertilized

eggs and embryos at 6hpf, 12hpf, and 1dpf to 5dpf. **(B)** Upper panel: diagram showing the *sas10* genomic DNA. Red bar, exons; blue line, introns. Lower panels: showing the DNA sequence changes in *sas10<sup>A8</sup>* and *sas10<sup>A2</sup>* two mutant alleles which are mutated in the exon4 of the *sas10* gene (red letters, deletion; blue letters, insertion; small letters: intron). **(C)** Representative images showing the overall morphology of a 5dpf-old WT and *sas10<sup>A2</sup>* (*s<sup>A2</sup>*). Black arrow, cardiac region; red arrow, swimming bladder; blue arrow, eye. **(D-G)** WISH using the *prox1* **(D)** and *hhex* **(E)** probes on 30hpf- and 50hpf-old embryos, and the *gata6* **(F)** and *foxa3* **(G)** probes on 30hpf-, 50hpf- and 3dpf-old embryos as shown. The number of total embryos examined (as denominator) and the number of embryos exhibiting the displayed phenotype (as numerator) are shown at the bottom.

**Supplementary Figure S4.** *mpp10* is essential for the organogenesis of digestive organs. **(A)** Whole-mount in situ hybridization (WISH) using the *mpp10* probe on WT unfertilized eggs and embryos at 6hpf, 12hpf, and 1dpf to 5dpf. **(B)** Upper panel: diagram showing the *mpp10* genomic DNA. Red bar, exons; blue line, introns. Lower panels: showing the DNA sequence changes in *mpp10<sup>A10</sup>* and *mpp10<sup>+2</sup>* two mutant alleles which are mutated in the exon2 of the *mpp10* gene (red letters, deletion; blue letters, insertion). **(C)** Representative images showing the overall morphology of a 5dpf-old WT and *mpp10<sup>A10</sup>* (*m<sup>A10</sup>*). Black arrow, cardiac region; red arrow, swimming bladder; blue arrow, eye. **(D-G)** WISH using the *prox1* **(D)** and *hhex* **(E)** probes on 30hpf- and 50hpf-old embryos, and the *gata6* **(F)** and *foxa3* **(G)** probes on 30hpf-, 50hpf- and 3dpf-old embryos. The number of total embryos genotyped (as denominator) and the number of embryos exhibiting the displayed phenotype (as numerator) are shown at the bottom.



**Supplementary Figure S5.** Small liver phenotype in *sas10<sup>A2</sup>* and *mpp10<sup>A10</sup>* is due to cell cycle arrest. **(A)** Co-immunostainings of phosphorylated-Histone 3 (P-H3) and Bhmt were performed on cryosections of WT, *sas10<sup>A2</sup>* and *mpp10<sup>A10</sup>* embryos at 2.5dpf. **(B)** Histogram showing the statistic analysis of P-H3-positive cells (red) against total cells counted in the liver area (Bhmt-positive, green) and in the neural tube. For each genotype, at least 17 cryosections from three embryos were used in counting P-H3-positive cells. Bar: 20µm.

**Supplementary Figure S6.** **(A)** *sas10<sup>A2</sup>* and *mpp10<sup>A10</sup>* mutant embryos did not show abnormal apoptotic activities. TUNEL assay was performed on cryosections of WT, *sas10<sup>A2</sup>* and *mpp10<sup>A10</sup>* embryos at 5dpf. The liver area was defined by immunostaining of Bhmt (green). Compared to the WT embryos, no abnormal apoptotic activities were observed in *sas10<sup>A2</sup>* and *mpp10<sup>A10</sup>* mutant embryos. DNaseI treated embryos were used as the positive control for apoptotic cells (red). At least 16 cryosections from three embryos were examined. Bar: 50µm. **(B)** Northern blot analysis of rRNA precursors using the 18S-F (left panel) and 18S-B (right panel) probes in 5dpf-old WT, *sas10<sup>A2</sup>* (*s<sup>A2</sup>*) and *mpp10<sup>A10</sup>* (*m<sup>A10</sup>*) embryos. 28S: loading control.

**Supplementary Figure S7.** **(A)** Sas10 directly interacts with Mpp10. *sas10* and *mpp10* coding sequences were cloned to the vector harboring the Gal4-activation domain (AD-V, vector; AD-S, AD-Sas10; AD-M, AD-Mpp10) or the vector harboring DNA-binding domain (BD-V, vector; BD-S, BD-Sas10; BD-M, BD-Mpp10), respectively, for yeast two-hybrid experiments as shown. Mpp10 showed an auto-activation activity (AD-V + BD-M

panel). **(B)** His-tagged Capn3 and Capn3<sup>C129S</sup> (C129S) expressed in the SF9 cells were purified using the Ni-NTA agarose beads. Proteins in different purification process were stained by Coomassie brilliant blue. CE, total protein extract from the cultured cells; FT, flow-through protein; wash1-3, supernatant collected after the beads being washed with washing buffer; elute1, eluted protein from the beads. Red arrow, Capn3; Black arrow, Capn3<sup>C129S</sup>. Smaller fragments in the elute1 sample likely represent the cleaved or early termination of translation products harboring the His-tag. **(C)** Western blot of Capn3 and Capn3<sup>C129S</sup> in different purification process using the anti-Capn3 antibody. Since this anti-Capn3 antibody was raised using the C-terminal 610-640 aa as the antigen, it cannot detect C-terminus-truncated Capn3 observed in the elute1 shown in **(B)**. WT Capn3 exhibited quick autocleavage after purification and majority of WT Capn3 displayed a smaller sizes compared with Capn3<sup>C129S</sup> (C129S). \*, cleaved Capn3 fragments. **(D,E)** His-tagged Mpp10 **(D)** and Mpp10-X **(E)** expressed in the *E.coli* were purified using the Ni-NTA agarose beads. Proteins in different purification process were stained by Coomassie brilliant blue. none-induced, total protein from *E.coli* without IPTG induction (as a negative control); induced, total protein from *E.coli* with IPTG induction; supernatant, soluble proteins after centrifugation of the cell lysates; pellet, insoluble proteins after centrifugation of the cell lysates; FT, flow-through proteins; wash1-3, supernatant after the beads being washed with washing buffer; elute1-5, eluted proteins from the beads. Red arrow, Mpp10; Black arrow, Mpp10-X.

**Supplementary Figure S8.** Mpp10 is a Capn3 target. **(A)** Cell lysates containing Capn3 or its inactive mutant Capn3<sup>C129S</sup> (C129S) were mixed with Ni-NTA beads purified Mpp10.

Reaction mixture containing 3 mM  $\text{Ca}^{2+}$  was incubated at 37°C for different time intervals (minutes) as indicated. **(B)** Cell lysates containing Capn3 and Mpp10 were mixed and placed on ice for 0, 10 and 30 min. **(C)** Western blot of Mpp10, Capn3b and  $\beta$ -Actin in the WT and *capn3b*<sup>-/-</sup> mutant. Total proteins were extracted from 5dpf-old embryos. Value below the figures indicated the relative intensity of Mpp10/Actin where WT was taken as 1.0.

**Supplementary Figure S9.** Nucleolus-localisation of Mpp10 depends on Sas10. **(A)** *HA-Sas10* plasmid transfected 293T cells were co-stained with antibodies against Sas10 and HA-tag. *Myc-Mpp10* plasmid transfected 293T cells were co-stained with antibodies against Mpp10 and Myc-tag. Untransfected cells were used as the negative control. Bar, 10 $\mu\text{m}$ . **(B)** HA-Sas10, Myc-Mpp10 were over-expressed alone or together in 293T cells. The cells were subjected to immunostaining using antibodies against HA-tag, Myc-tag or Fib as indicated. Bar, 10 $\mu\text{m}$ . **(C)** Immunostaining of HA-Sas10 or HA-Sas10-s5 (lacking the Mpp10-interacting domain) over-expressed in 293T cells using antibodies against HA-tag or Fib as indicated. Bar, 10 $\mu\text{m}$ .

**Supplementary Figure S10.** **(A,B)** *HA-sas10* or *HA-sas10-s5* mRNA was injected into one-cell stage WT and *sas10*<sup>42</sup> (*s*<sup>42</sup>) embryos, respectively. Total proteins were extracted at 28 hour post injection (hpi) for Western blot of Mpp10, Sas10 and Tub **(A)**. The signal of maternal Sas10 in *s*<sup>42</sup> were low but still distinguishable. The nonspecific band detected by Mpp10 antibody is likely due to protein extraction without deyolk. Embryos were also fixed and sectioned for co-immunostaining of Mpp10 and Fib **(B)**. The big box shows the

high magnification view of the nucleoli in the small box. The nucleolus-localisation of Mpp10 was only detected in WT and  $s^{A2}$  injected with *HA-sas10* mRNA but not in  $s^{A2}$  and  $s^{A2}$  injected with *HA-sas10-s5* mRNA. Bar, 5 $\mu$ m. (C) *Myc-Mpp10* was co-expressed with HA-Imp3 or HA-Imp4 in 293T cells for Co-IP analysis using an anti-HA antibody. Mpp10 was detected with its specific antibody and Imp3 and Imp4 were detected with anti-HA antibody.

**Supplementary Table S1.** List of key resources and notes.

| REAGENT or RESOURCE                         | SOURCE                              | IDENTIFIER                              |
|---------------------------------------------|-------------------------------------|-----------------------------------------|
| <b>Antibodies</b>                           |                                     |                                         |
| Mouse monoclonal Bhmt antibody              | Huabio                              | Hangzhou, China, Clone# D5G5            |
| Mouse monoclonal Fibrillarin antibody       | Abcam                               | Cat# ab4566; Clone# 38F3                |
| Mouse monoclonal $\alpha$ -Tubulin antibody | Beyotime                            | Cat# AT819-1; Clone# B-5-1-2            |
| Mouse monoclonal HA antibody                | Beyotime                            | Cat# AH158; Clone# HA-7                 |
| Mouse monoclonal Sas10 antibody             | Huabio                              | Hangzhou, China, Clone# E4D4            |
| Rabbit polyclonal $\beta$ -Actin antibody   | Huabio                              | Hangzhou, China, Clone# 1207-1          |
| Rabbit polyclonal Sas10 antibody            | Huabio                              | Hangzhou, China, Clone# 3382            |
| Rabbit polyclonal Mpp10 antibody            | Huabio                              | Hangzhou, China, Clone# 3570            |
| Rabbit polyclonal Def antibody              | Huabio                              | Hangzhou, China, Clone# 3203L           |
| Rabbit polyclonal Capn3 antibody            | Abcam                               | Cat# ab103250; Clone# N/A;<br>RRID: N/A |
| Rabbit polyclonal HA antibody               | Sigma-Aldrich                       | Cat# H6908; Clone# N/A; RRID:<br>I2149  |
| Rabbit polyclonal C-Myc antibody            | Huabio                              | Cat# 0912-2; Clone# N/A; RRID:<br>N/A   |
| <b>Chemicals</b>                            |                                     |                                         |
| AciI (SsiI) restriction enzyme              | Thermo Scientific                   | Cat# ER1791                             |
| Albumin Bovine Fraction V                   | HXbio                               | Cat# D332                               |
| Anti-Digoxigenin-AP Fab fragments           | Roche                               | Cat# 11093274910                        |
| Adhesion Microscope Slides                  | Citoglas                            | Cat# 188105                             |
| Anti-HA-Tag mAb (Agarose conjugated)        | Abmart                              | Cat# M20013                             |
| Anti-Myc-Tag mAb (Agarose conjugated)       | Abmart                              | Cat# M20012                             |
| Benzyl alcohol                              | Sigma-Aldrich                       | Cat# 402834                             |
| Benzyl benzoate                             | Sigma-Aldrich                       | Cat# B6630                              |
| CDP-Star                                    | Roche                               | Cat# 12041677001                        |
| Cell lysis buffer for Western and IP        | Beyotime                            | Cat# P0013                              |
| cOmplete, EDTA-free                         | Roche                               | Cat# 16829800                           |
| Difco™ Yeast Nitrogen Base w/o Amino Acids  | Becton,<br>Dickinson and<br>Company | Cat# 291940                             |
| DMEM High Glucose                           | Biological<br>Industries            | Cat# 06-1055-57-1ACS                    |
| DNase I                                     | Thermo<br>Scientific                | Cat# EN0521                             |
| Fetal Bovine Serum                          | Gibco                               | Cat# 10270                              |

|                                                                                                               |                       |                                |
|---------------------------------------------------------------------------------------------------------------|-----------------------|--------------------------------|
| HisSep Ni-NTA Agarose Resin                                                                                   | YEASEN                | Cat# 20502ES10                 |
| Pierce™ Protein Concentrator PES                                                                              | Thermo Scientific     | Cat# 88529                     |
| Phosphate Buffered Saline                                                                                     | Biological Industries | Cat# 02-024-1ACS               |
| Poly(ethylene glycol)                                                                                         | Sigma-Aldrich         | Cat# P4338                     |
| PolyJet                                                                                                       | SignaGen              | Cat# 100688                    |
| TRIpure Reagent                                                                                               | Aidlab                | Cat# RN01                      |
| Trypsin-EDTA                                                                                                  | Bio-light Biotech     | Cat# BL-025TE-00               |
| PvuII restriction enzyme                                                                                      | New England Biolabs   | Cat# R0151S                    |
| Sf-900™ II SFM                                                                                                | Gibco                 | Cat# 10902088                  |
| <b>Critical Commercial Assays</b>                                                                             |                       |                                |
| BCIP/NBT                                                                                                      | Beyotime              | Cat# C3206                     |
| Cell lysis buffer for Western and IP                                                                          | Beyotime              | Cat# P0013                     |
| DIG RNA Labeling Mix, 10x conc.                                                                               | Roche                 | Cat# 11277065910               |
| DIG RNA Labeling Mix, 10x conc.                                                                               | Roche                 | Cat# 11277073910               |
| EasySee Western Blot Kit                                                                                      | Trans                 | Cat# DW101-02                  |
| In Situ Cell Death Det. Kit TMR red                                                                           | Roche                 | Cat# 12156792910               |
| Maxi ECL Substrate                                                                                            | Sunky                 | Cat# 61804                     |
| PCR Cleanup Kit                                                                                               | Axygen                | Cat# 156                       |
| p-Histone H3                                                                                                  | Santa Cruz            | Cat# SC-8656-R                 |
| Plasmid Miniprep Kit                                                                                          | Axygen                | Cat# 155                       |
| Matchmaker® Gold Yeast Two-Hybrid System                                                                      | Clontech              | Cat# PT4084-1                  |
| <b>Experimental Models: Cell Lines</b>                                                                        |                       |                                |
| Human: HEK293T cells                                                                                          | ATCC                  | Cat# CRL-3216; RRID: CVCL_0063 |
| <b>Experimental Models: Zebrafish</b>                                                                         |                       |                                |
| Zebrafish: AB                                                                                                 | Singapore             | N/A                            |
| Zebrafish: sas10 <sup>Δ2</sup>                                                                                | This paper            | N/A                            |
| Zebrafish: mpp10 <sup>Δ10</sup>                                                                               | This paper            | N/A                            |
| <b>Oligonucleotides</b>                                                                                       |                       |                                |
| Primers for <i>sas10</i> gRNA, Forward:<br>5'-TAATACGACTCACTATAgaagaggatga<br>agataaagGTTTTAGAGCTAGAAATAGC-3' | This paper            | N/A                            |
| Primers for <i>mpp10</i> gRNA, Forward:<br>5'-TAATACGACTCACTATAggtggttgaaaa<br>cttcgacGTTTTAGAGCTAGAAATAGC-3' | This paper            | N/A                            |
| Primers for <i>sas10</i> mutant ID, Forward:                                                                  | This paper            | N/A                            |

|                                                                                |            |     |
|--------------------------------------------------------------------------------|------------|-----|
| 5'-GACAGTGATGATCCTGAAGCGT-3'                                                   |            |     |
| Primers for <i>sas10</i> mutant ID, Reverse:<br>5'-TCTAGATCGCTCTCCATGTCTG-3'   | This paper | N/A |
| Sequencing primers 1 for <i>sas10</i> , Forward:<br>5'-AGAGGAAGACGAGGCTACAA-3' | This paper | N/A |
| Sequencing primers 2 for <i>sas10</i> , Forward:<br>5'-GCGCTTCTATAACGCCATGG-3' | This paper | N/A |
| Primer: Sas10(1-470aa), Forward:<br>5'-CGCGGATCCAATGGTCCGAGCAAGA-3'            | This paper | N/A |
| Primer: Sas10(1-470aa), Reverse:<br>5'-TCCCCCGGGGAGTTTGACACTTCT-3'             | This paper | N/A |
| Primer: 5'ETS probe, Forward:<br>5'-CCGGTCTACCTCGAAAGTCC-3'                    | This paper | N/A |
| Primer: 5'ETS probe, Reverse:<br>5'-CGAGCAGAGTGGTAGAGGAA-3'                    | This paper | N/A |
| Primer: ITS1 probe, Forward:<br>5'-CTCGGAAAACGGTGAACCTG-3'                     | This paper | N/A |
| Primer: ITS1 probe, Reverse:<br>5'-GTGTTTCGTTTCAGGGTCCGA-3'                    | This paper | N/A |
| Primer: 18S F probe, Forward:<br>5'-ATCGCTCCATCCGTTACTTG-3'                    | This paper | N/A |
| Primer: 18S F probe, Reverse:<br>5'-GCGCCTAAAGTACCATCGAA-3'                    | This paper | N/A |
| Primer: 18S F probe, Forward:<br>5'-ACGCGAGATGGAGCAATAAC-3'                    | This paper | N/A |
| Primer: 18S F probe, Reverse:<br>5'-CCTCGTTGATGGGAAACAGT-3'                    | This paper | N/A |
| Primer: Sas10(1-150aa), Reverse:<br>5'-TCCCCCGGGCTCAATTTCTTCAAG-3'             | This paper | N/A |
| Primer: Sas10(1-320aa), Reverse:<br>5'-TCCCCCGGGACGCAGTTGAGGAGC-3'             | This paper | N/A |
| Primer: Sas10(100-320aa), Forward:<br>5'-CGGGATCCGATGATGAGGAAGAT-3'            | This paper | N/A |
| Primer: Sas10(200-470aa), Forward:<br>5'-CGGGATCCGTGAAAGATTTAAAG-3'            | This paper | N/A |
| Primers for <i>mpp10</i> mutant ID, Forward:<br>5'-AGTGTCCAGGATGTTTTGGCA-3'    | This paper | N/A |
| Primers for <i>mpp10</i> mutant ID, Reverse:<br>5'-TCCAAATCGGAGTCTTCGCC-3'     | This paper | N/A |
| Sequencing primers 1 for <i>mpp10</i> , Forward:                               | This paper | N/A |

|                                                                                                               |            |     |
|---------------------------------------------------------------------------------------------------------------|------------|-----|
| 5'-AACCGAACTGGACTCAGTCT-3'                                                                                    |            |     |
| Sequencing primers 2 for <i>mpp10</i> , Forward:<br>5'-AATGGCTCCTGCAATCACTG-3'                                | This paper | N/A |
| Sequencing primers 3 for <i>mpp10</i> , Forward:<br>5'-TTGCGGTCTTCTCAGGCCTT-3'                                | This paper | N/A |
| Primer: Mpp10(1-695aa), Forward:<br>5'-CCGGAATTCATGGCGACGAGGGAT-3'                                            | This paper | N/A |
| Primer: Mpp10 (1-695aa), Reverse:<br>5'-CGCGGATCCTTACAGCTTGAGTTT-3'                                           | This paper | N/A |
| Primer: Mpp10 (1-230aa), Reverse:<br>5'-CGGGATCCCTCCCTTCATTCCC-3'                                             | This paper | N/A |
| Primer: Mpp10 (1-440aa), Reverse:<br>5'-CGGGATCCTTTGATGATATCCTC-3'                                            | This paper | N/A |
| Primer: Mpp10 (231-560aa), Forward:<br>5'-CGGAATTCGAAATTGATTACTTT-3'                                          | This paper | N/A |
| Primer: Mpp10 (231-560aa), Reverse:<br>5'-CGGGATCCAGCCAGCAGAGTGGC-3'                                          | This paper | N/A |
| Primer: Mpp10 (4411-695aa), Forward:<br>5'-CGGAATTCAGAGAATCAAAGAT-3'                                          | This paper | N/A |
| Primer: Mpp10 (100-560aa), Forward:<br>5'-CGGAATTCGCTATAACATTTCTG-3'                                          | This paper | N/A |
| Primer: Mpp10 (200-560aa), Forward:<br>5'-CGGAATTCGAAGTGGATGACACG-3'                                          | This paper | N/A |
| Primer: Mpp10 (231-600aa), Reverse:<br>5'-CGGGATCCGTGAATCTTCAGACG-3'                                          | This paper | N/A |
| Primer: Mpp10 (231-650aa), Reverse:<br>5'-CGGGATCCATCCATCCATCGTT-3'                                           | This paper | N/A |
| Primer: Mpp10 (211-220aa deletion), Forward:<br>5'-ACGTTTTTTAAACTGTCAGAAAAAAG<br>AGAGGGAAAAGGGAATGAAGGGGAG-3' | This paper | N/A |
| Primer: Mpp10 (211-220aa deletion), Reverse:<br>5'-ATTCCCTTTTCCCTCTCTTTTTTCTGA<br>CAGTTTAAAAAACGTGTCATCCAC-3' | This paper | N/A |
| Primer: Imp3, Forward:<br>5'-CGGGATCCGTACGTAAATTAATTTACGAGC-3'                                                | This paper | N/A |
| Primer: Imp3, Reverse:<br>5'-CGGAATTCCTTAGGCCATGAGGTCAAAGT-3'                                                 | This paper | N/A |
| Primer: Imp4, Forward:<br>5'-CGGGATCCCTGCGACGGGAAGTGAGACT-3'                                                  | This paper | N/A |
| Primer: Imp3, Reverse:                                                                                        | This paper | N/A |



|                                              |                 |                                                                                                         |
|----------------------------------------------|-----------------|---------------------------------------------------------------------------------------------------------|
| 5'- CGGGATCCCTATTCCACGCTCAAGAATT-3'          |                 |                                                                                                         |
| <b>Recombinant DNA</b>                       |                 |                                                                                                         |
| pCS2+-Sas10                                  | This paper      | N/A                                                                                                     |
| pCS2+-HA-Sas10                               | This paper      | N/A                                                                                                     |
| pCS2+-HA-Sas10(1-150aa)                      | This paper      | N/A                                                                                                     |
| pCS2+-HA-Sas10(1-320aa)                      | This paper      | N/A                                                                                                     |
| pCS2+-HA-Sas10(100-320aa)                    | This paper      | N/A                                                                                                     |
| pCS2+-HA-Sas10(200-470aa)                    | This paper      | N/A                                                                                                     |
| pCS2+-HA-Sas10(226-307aa deletion)           | This paper      | N/A                                                                                                     |
| pCS2+-Mpp10                                  | This paper      | N/A                                                                                                     |
| pCS2+-HA-Mpp10                               | This paper      | N/A                                                                                                     |
| pCS2+-Myc-Mpp10                              | This paper      | N/A                                                                                                     |
| pCS2+-Myc-Mpp10(1-230aa)                     | This paper      | N/A                                                                                                     |
| pCS2+-Myc-Mpp10(1-440aa)                     | This paper      | N/A                                                                                                     |
| pCS2+-Myc-Mpp10(230-560aa)                   | This paper      | N/A                                                                                                     |
| pCS2+-Myc-Mpp10(440-695aa)                   | This paper      | N/A                                                                                                     |
| pCS2+-Myc-Mpp10(100-560aa)                   | This paper      | N/A                                                                                                     |
| pCS2+-Myc-Mpp10(230-600aa)                   | This paper      | N/A                                                                                                     |
| pCS2+-Myc-Mpp10(230-650aa)                   | This paper      | N/A                                                                                                     |
| pCS2+-Myc-Mpp10(1-440aa, 211-220aa deletion) | This paper      | N/A                                                                                                     |
| pCS2+-Myc-Mpp10(211-220aa deletion)          | This paper      | N/A                                                                                                     |
| pCS2+-Def                                    | (29)            | N/A                                                                                                     |
| pCS2+-Myc-Def                                | (29)            | N/A                                                                                                     |
| pCS2+-HA-Imp3                                | This paper      | N/A                                                                                                     |
| pCS2+-HA-Imp4                                | This paper      | N/A                                                                                                     |
| pcDNA <sup>+</sup> -HA-Capn3                 | (29)            | N/A                                                                                                     |
| pcDNA <sup>+</sup> -HA-Capn3C129S            | (29)            | N/A                                                                                                     |
| pcDNA <sup>+</sup> - Capn3                   | (29)            | N/A                                                                                                     |
| pcDNA <sup>+</sup> - Capn3C129S              | (29)            | N/A                                                                                                     |
| pFastBac-Capn3                               | (29)            | N/A                                                                                                     |
| pFastBac-Capn3C129S                          | (29)            | N/A                                                                                                     |
| pGAD-Sas10                                   | This paper      | N/A                                                                                                     |
| pGAD-Mpp10                                   | This paper      | N/A                                                                                                     |
| pGBK-Sas10                                   | This paper      | N/A                                                                                                     |
| pGBK-Mpp10                                   | This paper      | N/A                                                                                                     |
| <b>Software and Algorithms</b>               |                 |                                                                                                         |
| Motif Scan                                   | MyHits database | <a href="https://myhits.isb-sib.ch/cgi-bin/motif_scan">https://myhits.isb-sib.ch/cgi-bin/motif_scan</a> |

A

|    |                                                                                                            |     |
|----|------------------------------------------------------------------------------------------------------------|-----|
| hu | MVGRSRRRGAAKWAAVRAKAGPTLTDENGDDLGLPPSPGDTSYYQDOVDDFHEARSRAALA                                              | 61  |
| mu | MVKKSRRRGAAQWAAVRAQAGLTATDENEDDLGLPPSPGDSSYYQDOVDFHEARSRAVLA                                               | 61  |
| zf | MVRARR---AVKKPRTKKQOEYDSDDPEAYTNEAIPDKKSSSYVEDKVDFHNEKISKLLA                                               | 58  |
| hu | KGWNEVQSGDEEDGEEEEEEVLALDMDDEDDDEDGNAGEEEEEENADDDGGSSVQSEAEAS                                              | 122 |
| mu | KGWNEVESG-EEDGDEEEE-VLPLDIDDGDDDEDGESS--EEEEVGEDDDGGSSVQSEAEAS                                             | 118 |
| zf | RGVPEIS---DEEDEDKAVEVMPLTLSSESDEDDDEEK-EEEEDDDDDEEDGTDMESDLEGK                                             | 115 |
| hu | VDP----SLSWGQRKKLYD TDYGSKSRGROSQOEAE EEEERE EEEFEAQI IQRRLAQALQED                                         | 179 |
| mu | VDP----SLSWGQRKKLYD TDYGSKSRGROSQOEVE EEEERE EEEFEAQI IQRRLAQALQED                                         | 175 |
| zf | KDDDLPNDLAWGNKKKIFYD TDYATK-KGK-SLEETEAE DKEEDEATKI QKRLAAKLSEE                                            | 174 |
| hu | DFGVAVVEAFAPKVPQVDEA--ETRVVKDLAKVSVKEKLMRKE SPELLELIEDLKVKLT                                               | 238 |
| mu | DFGVAVVEAFAPKVPQVDEA--ETRVVKDLAKVSVKEKLMKKESPELLELIEDLQAKLT                                                | 234 |
| zf | DYDLNLLLEEFVVD A E V E K E V K K E E R I V K D L K T L S Q E K L K L K K E S P E L L E L I Q D F K A K L T | 235 |
| hu | EVKDELEPLLELVEQGIIPP GKG S Q Y L R T K Y N L Y L N Y C S N I S F Y L I L K A R R V P A H G H P V I E       | 299 |
| mu | EVKDELEPLLQLVKGVIP TGRGSEY L K T K Y N L Y L N Y C A N I S F Y L I L K A R R V P A H G H P V I E           | 295 |
| zf | ELRDEVQPLVKMVKNGRIPP GKG A N Y I I T K Q Q L Y L N Y C T N I S F Y L V L K A K R I P A H N H P V I E       | 296 |
| hu | RLV TYRNLINKLSVVDQKLSSEIRHLLTLKDDAVKKELIPKAKSTKPKPKSVSKTSAAACA                                             | 360 |
| mu | RLV TYRNLINKLSVVDQKLSSEIRHLLTAKDGAVKKEMTPKAKLTKTTPKPSVKQAAAVA--                                            | 354 |
| zf | RLLYRNLINELGAVDARLAPQLRQLLSGEKPDRLPKRLPGSKHTKLTKEKAGLEEAEES--                                              | 355 |
| hu | VTDLSDDSDFDEKAKLKY Y KEIEDRQKLRKKEENS TEEQALEDQ----NAKRAITYQIAK                                            | 417 |
| mu | ---LTDEP DFDG-AALKYYKEMEDROELKRKKEENS AEEQALEEQ----NAKRAITYQIAK                                            | 407 |
| zf | -----ESDEEANLRFYNAMA EKQKLRKKESEM QNEDKLENEEMEGDAKR RITYEMSK                                               | 408 |
| hu | NRGLTPRRKKIDRNPRVKHREKFRRAKIRRRGQVREVRKEEQRYSGELSGIRAGVKKSIKL                                              | 478 |
| mu | NRGLTPRRKKIDRNPRVKHREKFRKAKIRRRGQVREVRREEQRYSGELSGIRAGVKKSIKL                                              | 468 |
| zf | NKGLTPKRKKIDRNPRVKHREKFRRAQIRRRGQVREVRHEEA RYSGEWSGIRAGVKRSVKL                                             | 469 |
| hu | K 479                                                                                                      |     |
| mu | K 469                                                                                                      |     |
| zf | K 470                                                                                                      |     |

Sas10/Utp3/C1D family

B

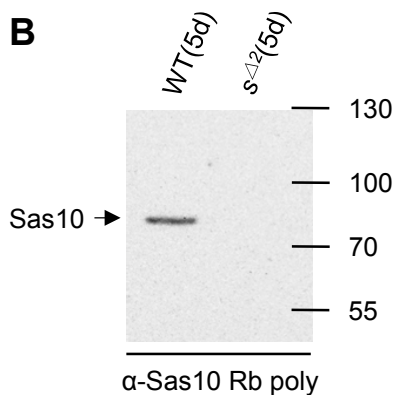

C

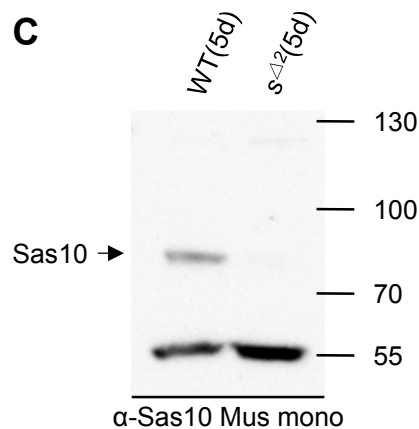

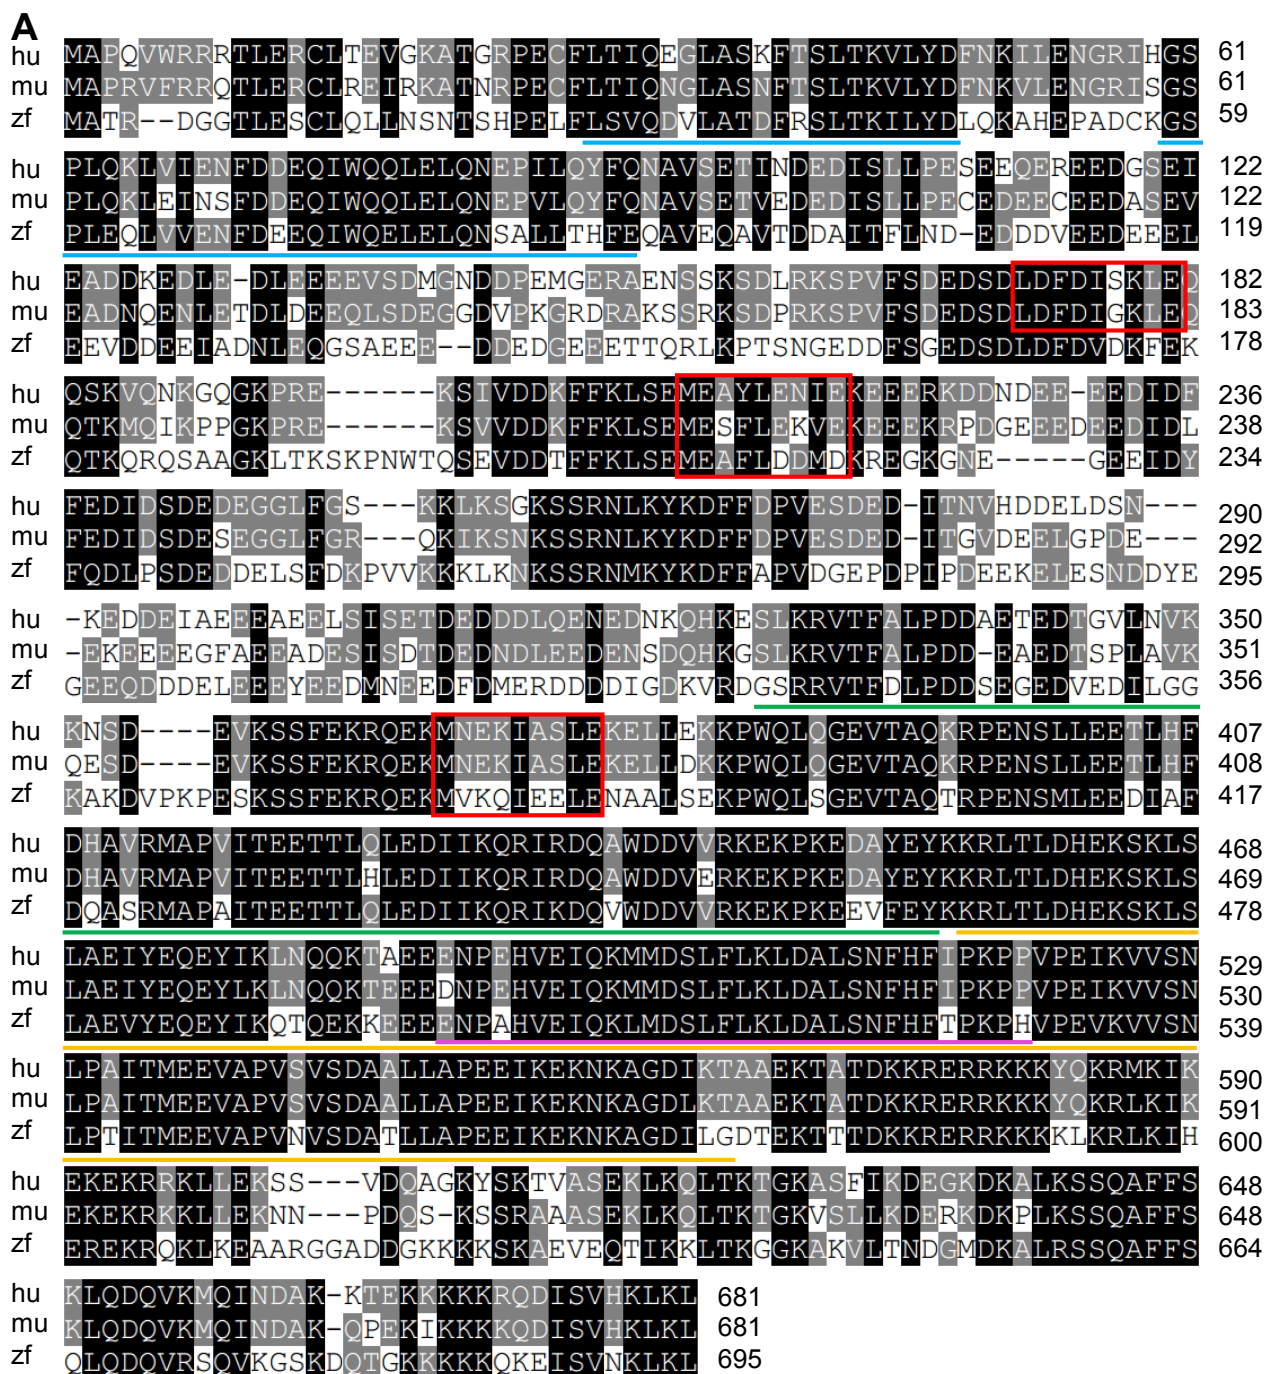

Capn3 recognize site      Ct-Utp3      Yeast-Imp3      hu-Imp4      hu-Imp3

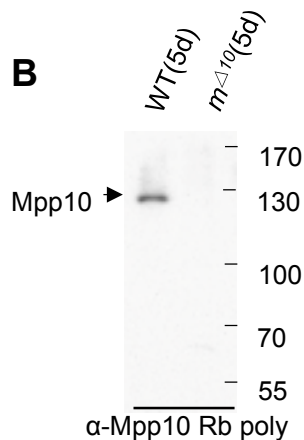

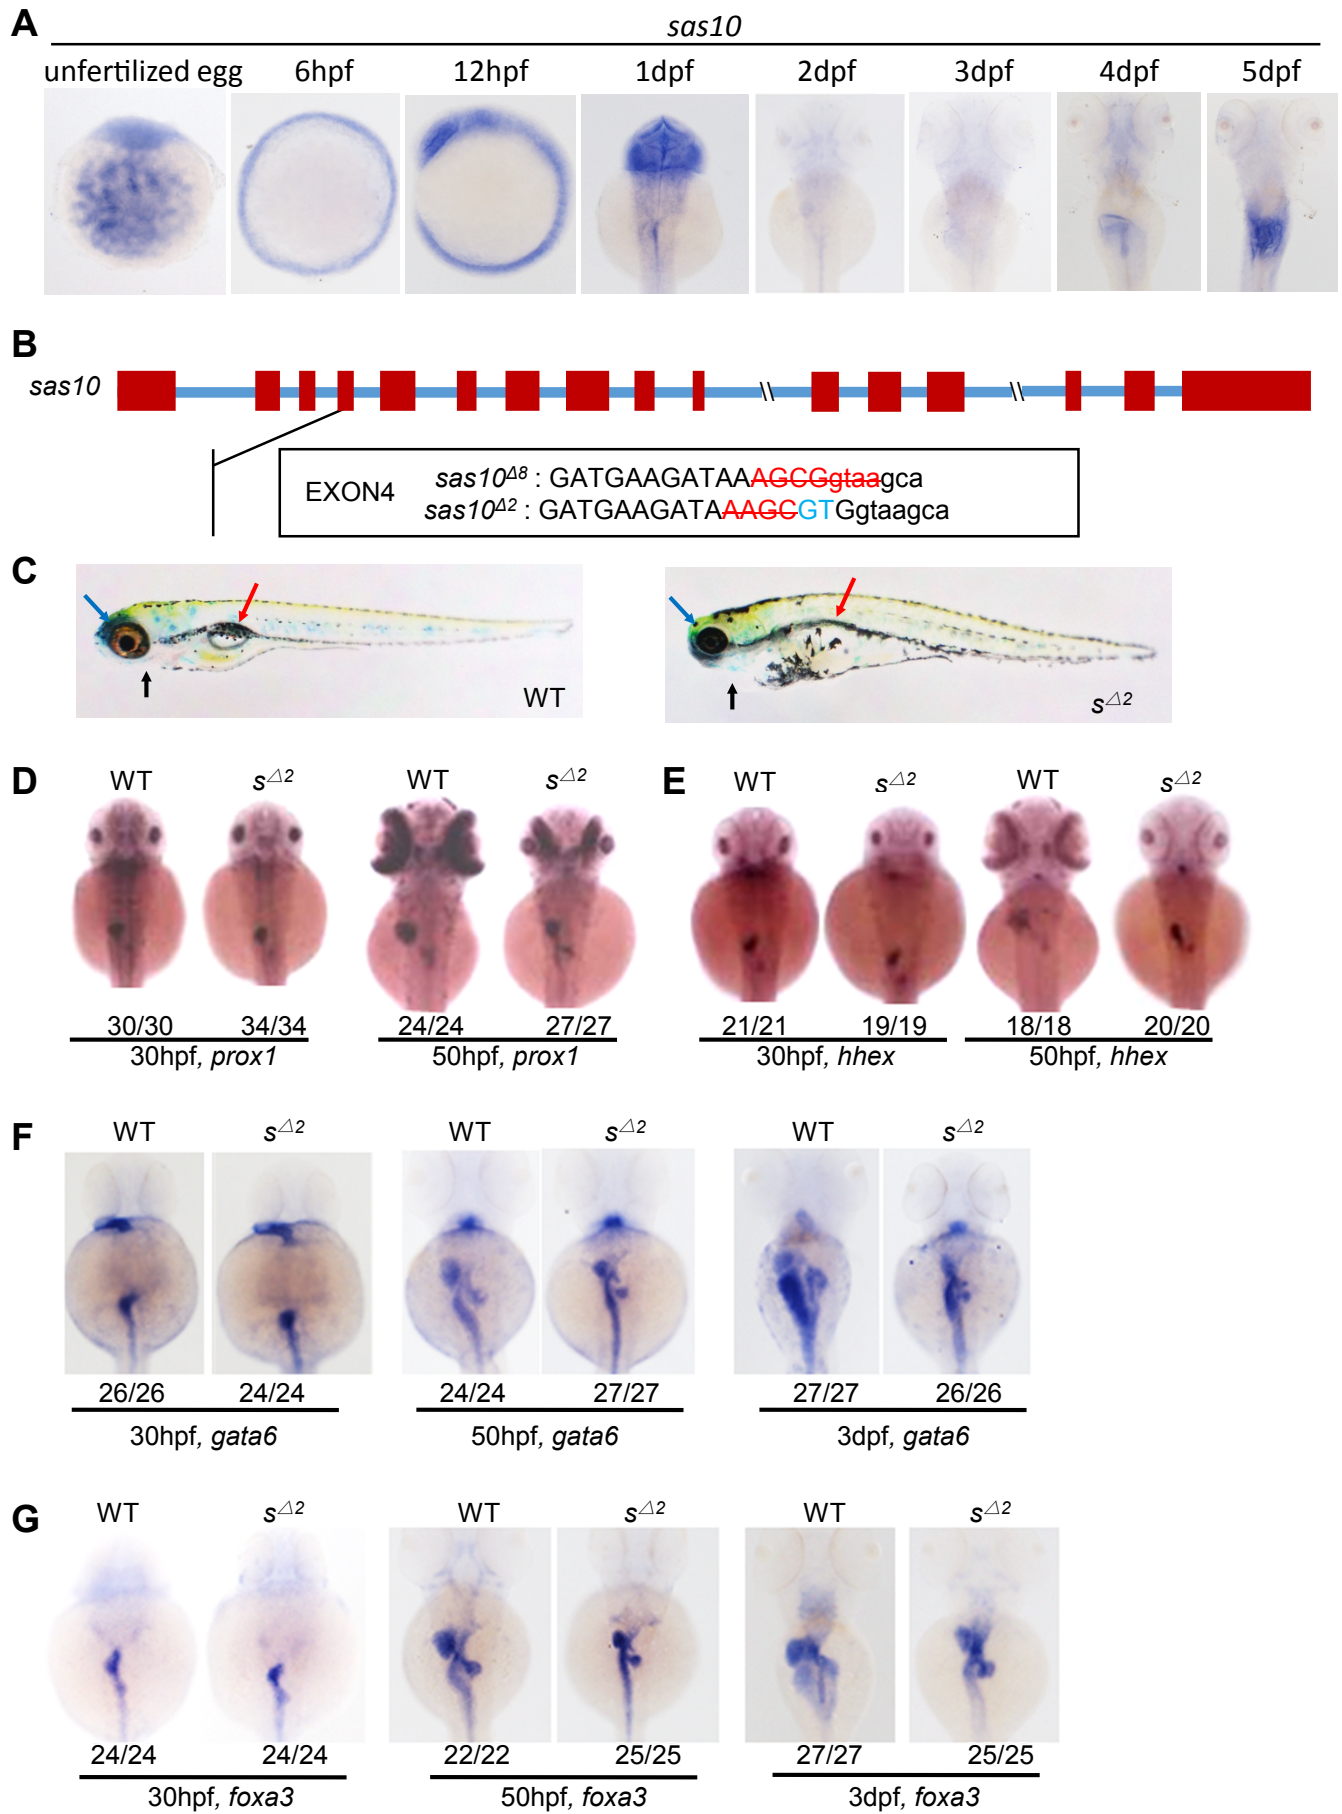



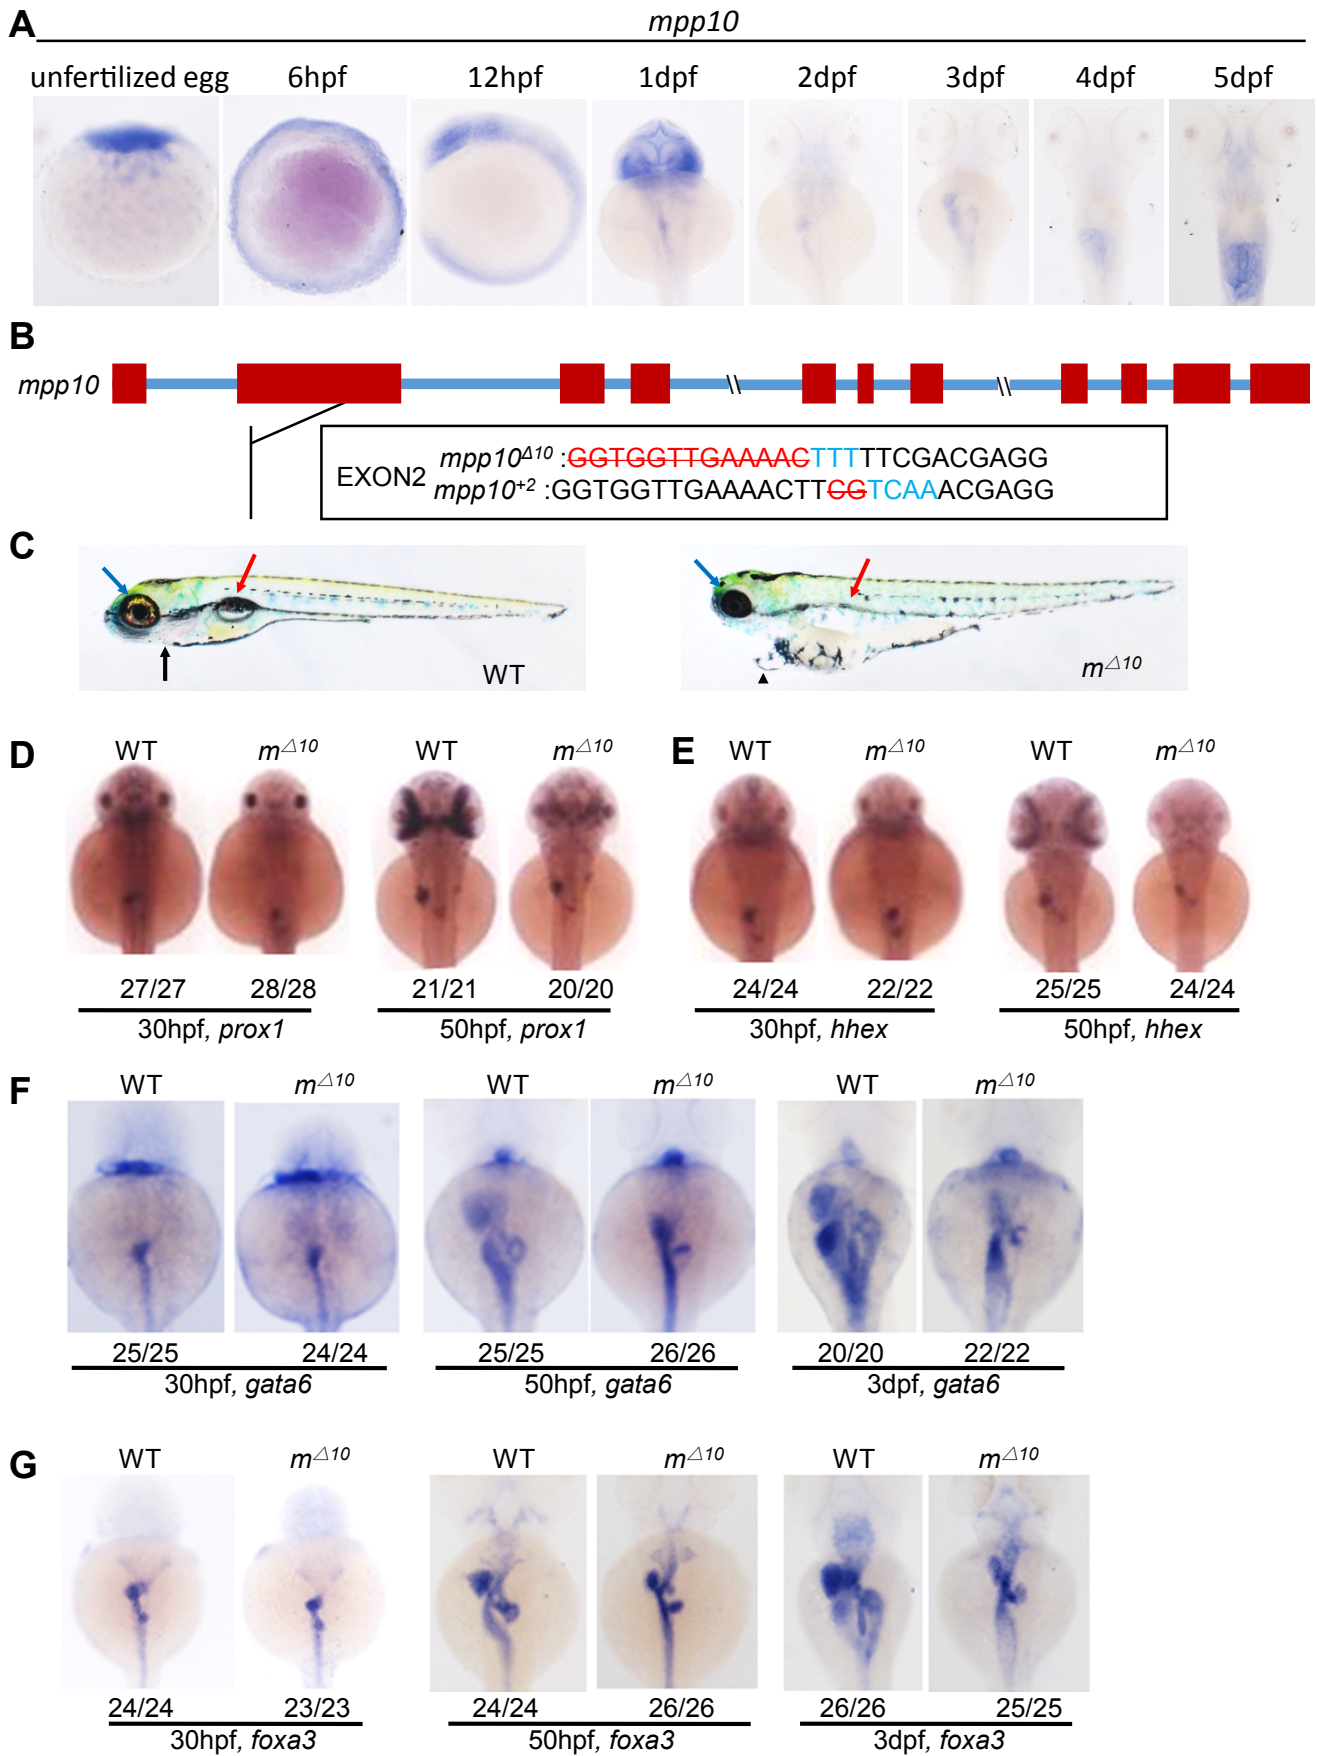

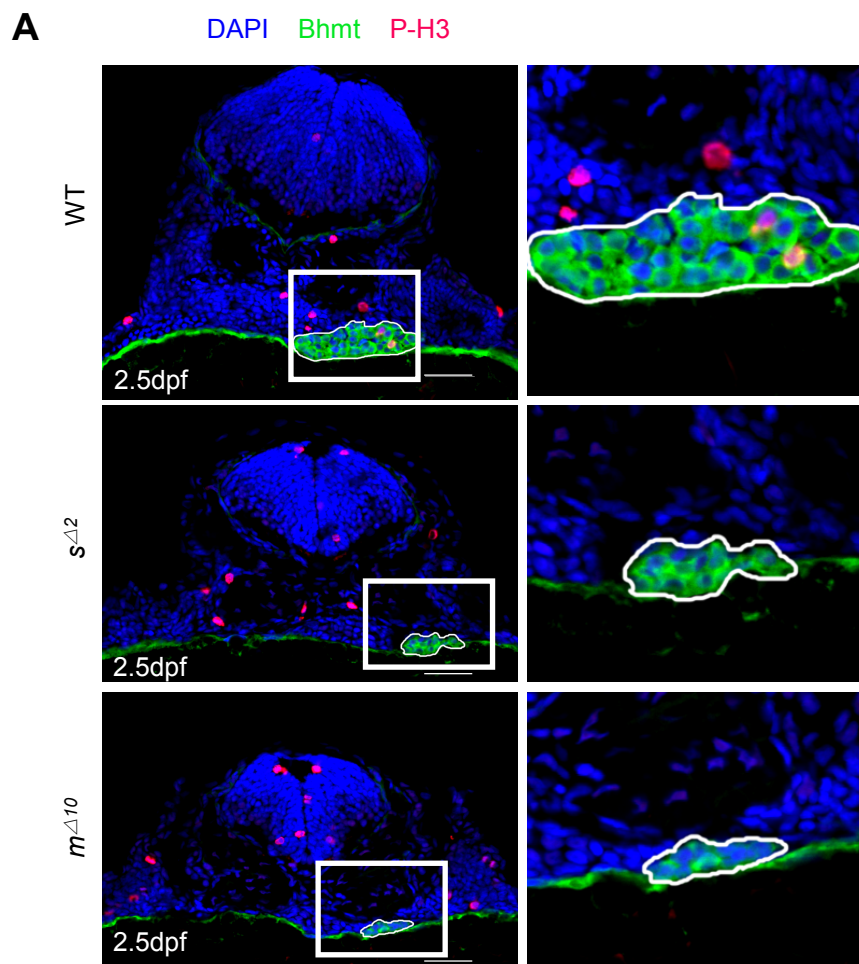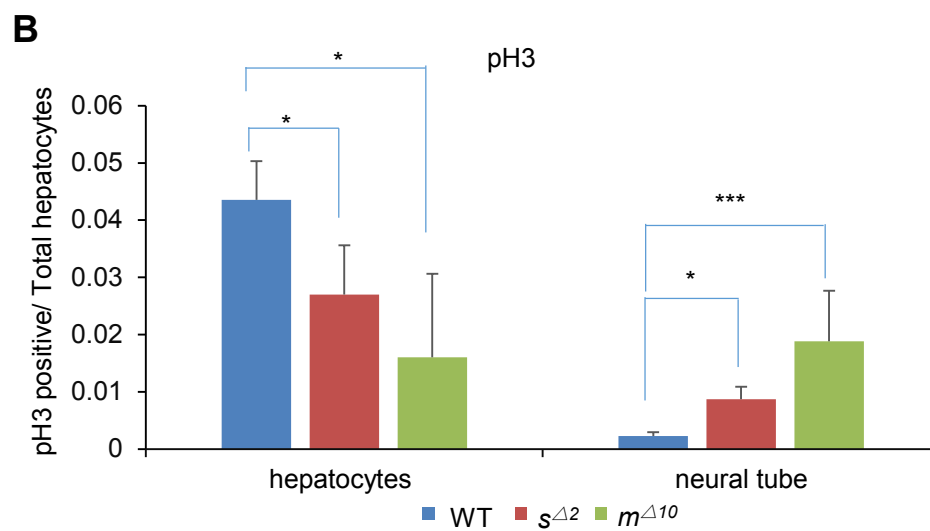

Figure S6

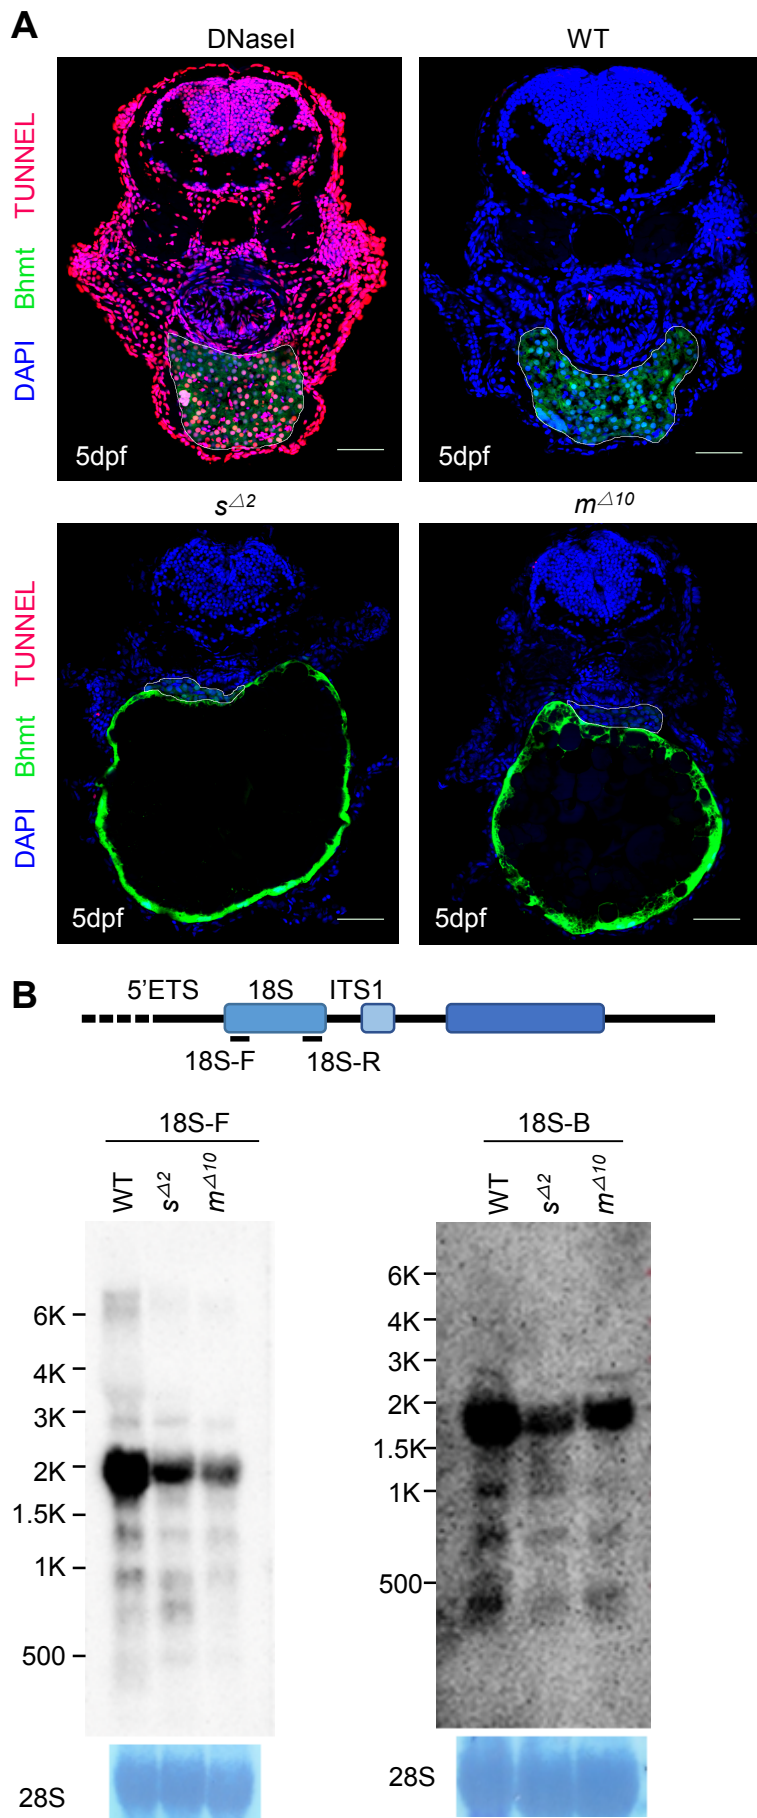

**Figure S7**

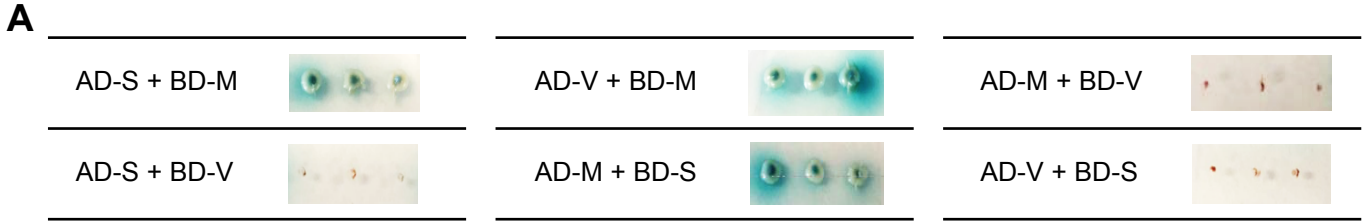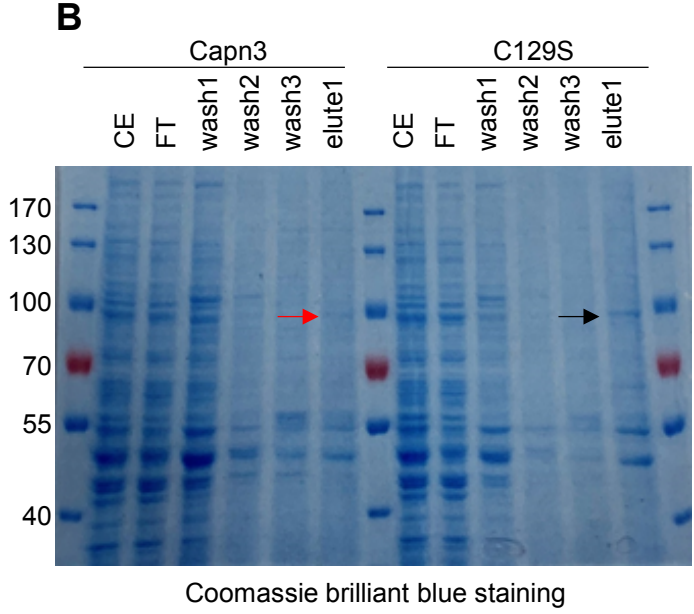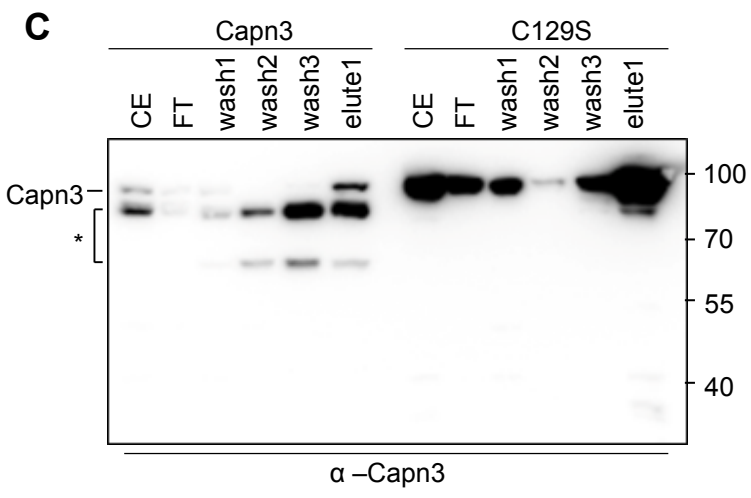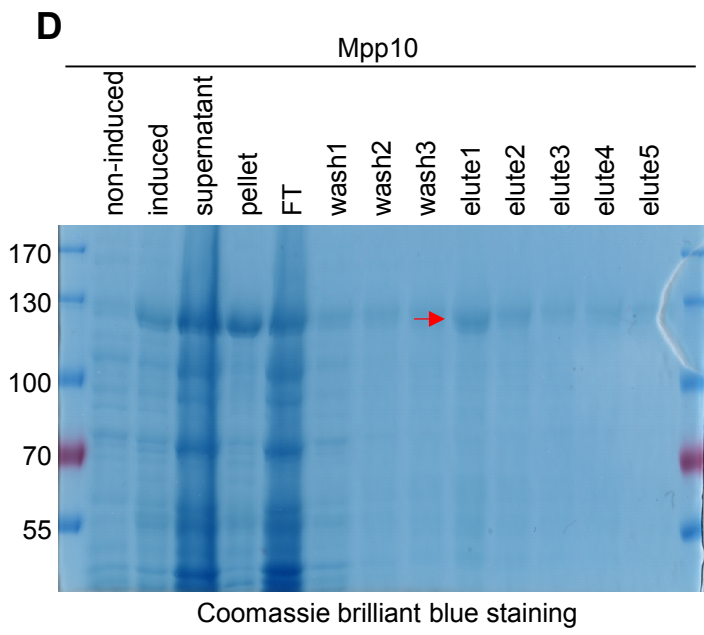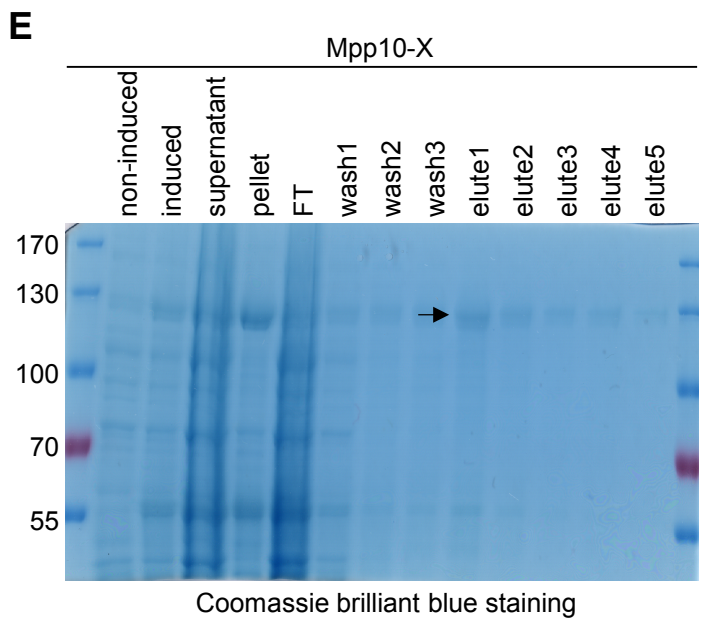



Figure S8

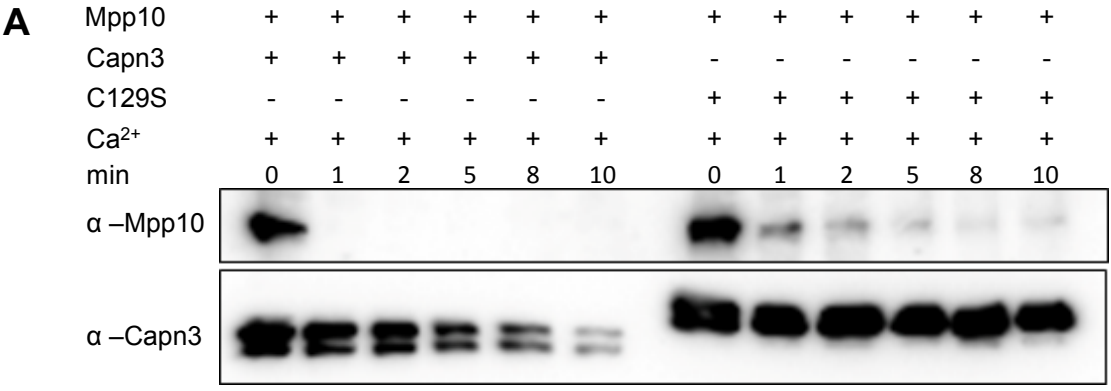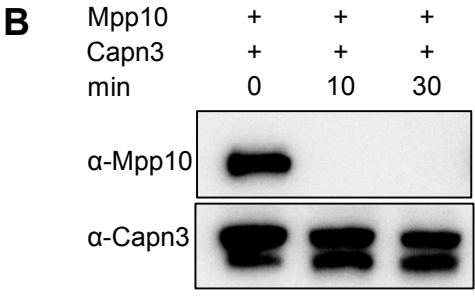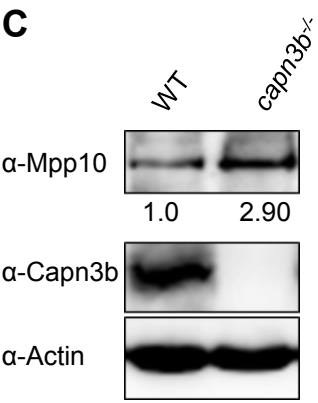

Figure S9

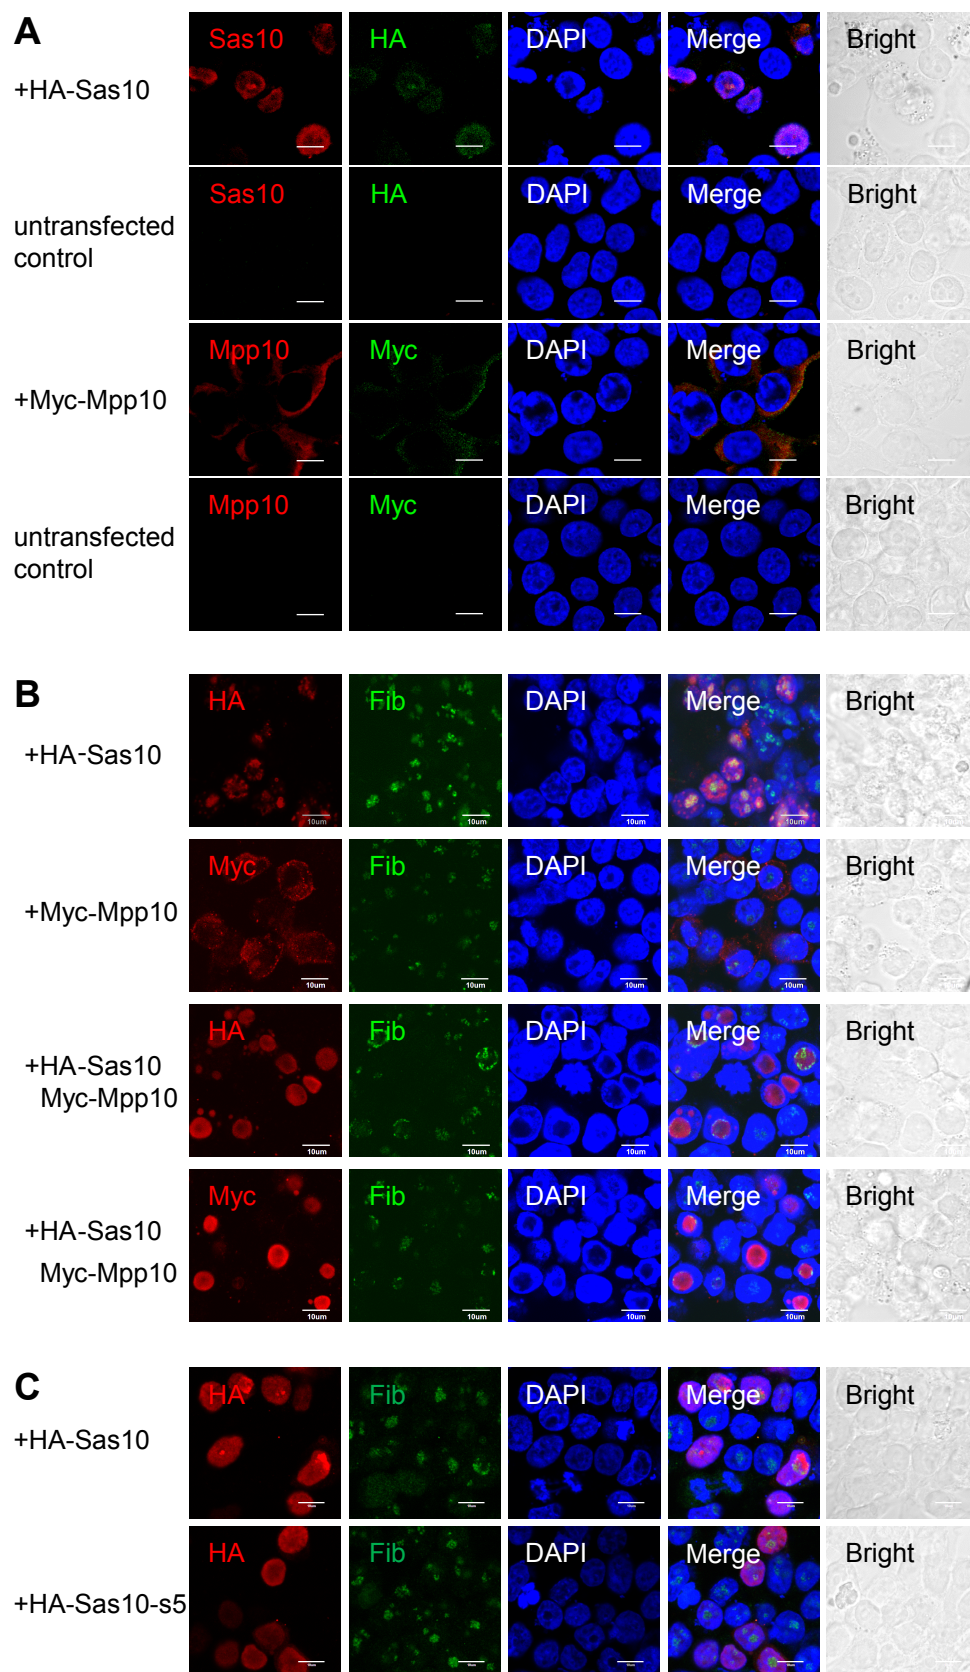

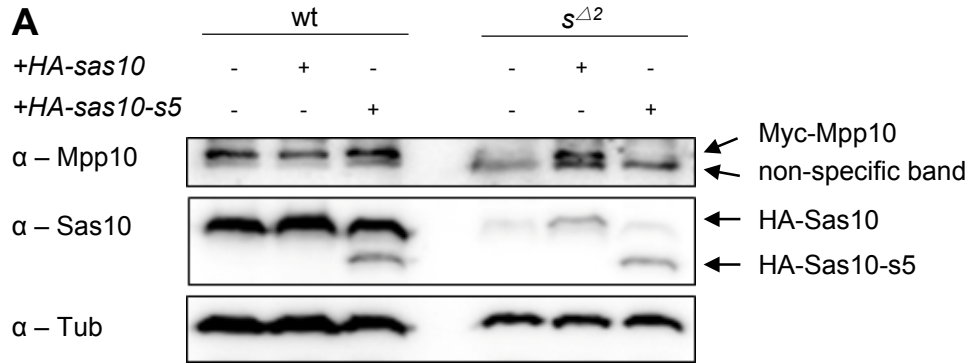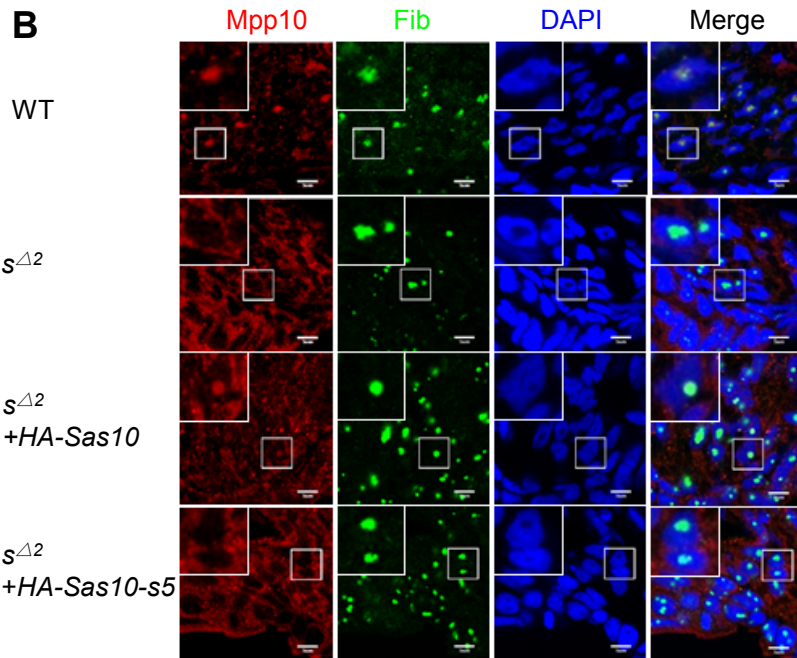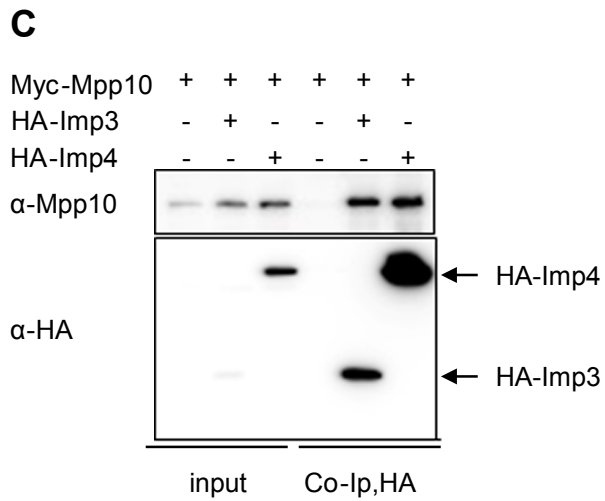

Supplement: gkz105_supplemental_file.pdf [file gkz105_supplemental_file.pdf]
